# Supplementary material for: Pressure-induced structural changes in wet vitamin B12
Source: Royal Society of Chemistry journal article supplement (doi:10.1039/c003378b), 2010-01-01
Supplement: c003378b.pdf [file c003378b.pdf]

# Pressure-induced structural changes in wet vitamin B12

Francesca P. A. Fabbiani,\* Gernot Buth, Birger Dittrich and Heidrun Sowa

## Electronic Supplementary Information

### Contents:

|                                           |        |
|-------------------------------------------|--------|
| Crystal data                              | p 1    |
| Structure refinement                      | pp 1-2 |
| Structure numbering scheme                | p 2    |
| Structure comparison                      | p 3    |
| PLATON calculations                       | pp 4-5 |
| Electron density maps generated with COOT | p 6    |
| Side chain torsion angles                 | p 7    |
| H-bonding parameters                      | p 8-13 |

### Crystal data

*Crystal data for “wet B12” at ambient pressure:* C<sub>63</sub>H<sub>88</sub>CoN<sub>14</sub>O<sub>14</sub>P, 23.5(H<sub>2</sub>O), *M* = 1778.75, red block, orthorhombic, *P*2<sub>1</sub>2<sub>1</sub>2<sub>1</sub>, *a* = 15.8260(9), *b* = 22.4438(13), *c* = 25.4429(16), *V* = 9037.2(9), *Z* = 4,  $\mu$  = 0.298 mm<sup>2</sup>,  $\rho_{\text{calc}}$  = 1.307 g cm<sup>-3</sup>, *T* = 293(2) K, 101570 reflections measured, of which 26484 were independent (*R*<sub>int</sub> = 0.0436), 917 parameters, 168 restraints, *R*<sub>1</sub> = 0.0731 [based on *F* and 19937 data with *I* > 2σ(*I*)], *wR*<sub>2</sub> = 0.2254 [based on *F*<sup>2</sup> and all 26484 reflections], Flack = 0.014(11), the final difference map extremes were +0.82 and -0.18 e Å<sup>3</sup>.

*Crystal data for “wet B12” at 1.0 GPa:* C<sub>63</sub>H<sub>88</sub>CoN<sub>14</sub>O<sub>14</sub>P, 22(H<sub>2</sub>O), *M* = 1751.73, red block, orthorhombic, *P*2<sub>1</sub>2<sub>1</sub>2<sub>1</sub>, *a* = 15.9455(4), *b* = 21.0511(5), *c* = 23.8739(8), *V* = 8013.8(4), *Z* = 4,  $\mu$  = 0.333 mm<sup>2</sup>,  $\rho_{\text{calc}}$  = 1.452 g cm<sup>-3</sup>, *T* = 293(2) K, 53048 reflections measured, of which 10032 were independent (*R*<sub>int</sub> = 0.052), 936 parameters, 168 restraints, *R*<sub>1</sub> = 0.0665 [based on *F* and 7534 data with *I* > 2σ(*I*)], *wR*<sub>2</sub> = 0.2165 [based on *F*<sup>2</sup> and all 10032 reflections], Flack = 0.02(2), the final difference map extremes were +0.58 and -0.52 e Å<sup>3</sup>.

### Structure refinement

Restraints:

For ADPs the same similarity and rigid-bond restraints were applied in the refinement of the two structures, namely:

| <b>Rigid-bond (DELU command in SHELXL)</b> | <b>Similarity (SIMU command in SHELXL)</b> |
|--------------------------------------------|--------------------------------------------|
| C1 > C19 (corrin ring C-atoms)             | C27 O28 N29 (amide side chain a)           |
| C1R > O8R (ribose atoms)                   | C32 O33 N34 (amide side chain b)           |
| N1B > C10B (benzimidazole atoms)           | C38 O39 N40 (amide side chain c)           |
| C12 C47 C46 (terminal methyl groups)       | C43 O44 N45 (amide side chain d)           |
| C1 C20 (terminal methyl group)             | C50 O51 N52 (amide side chain e)           |
| C1C N2C (cyano group)                      | C61 O62 N63 (amide side chain g)           |
| C3 C30 (amide side chain b)                |                                            |
| C7 C37 (amide side chain c)                |                                            |
| C60 C61 (amide side chain g)               |                                            |

Bond distances restraints were also applied, values in bracket refer to the unstrained values:

**Ambient pressure**

DFIX C27 N29 1.34 0.005 [1.266(7)]  
DFIX C32 N34 1.34 0.005 [1.235(8)]  
DFIX C43 N45 1.34 0.005 [1.287(8)]  
DFIX C27 O28 1.24 0.01 [1.152(7)]  
DFIX C32 O33 1.24 0.01 [1.198(7)]  
DFIX C43 O44 1.24 0.01 [1.215(7)]

**High pressure**

DFIX C32 N34 1.34 0.01 [1.297(14)]  
DFIX C38 N40 1.34 0.01 [1.302(10)]  
DFIX C57 N59 1.34 0.01 [1.280(12)]  
DFIX C61 O62 1.24 0.01 [1.208(11)]  
DFIX C32 O33 1.24 0.01 [1.270(11)]  
DFIX C1C N2C 1.16 0.01 [1.138(12)]

**Structure numbering scheme**

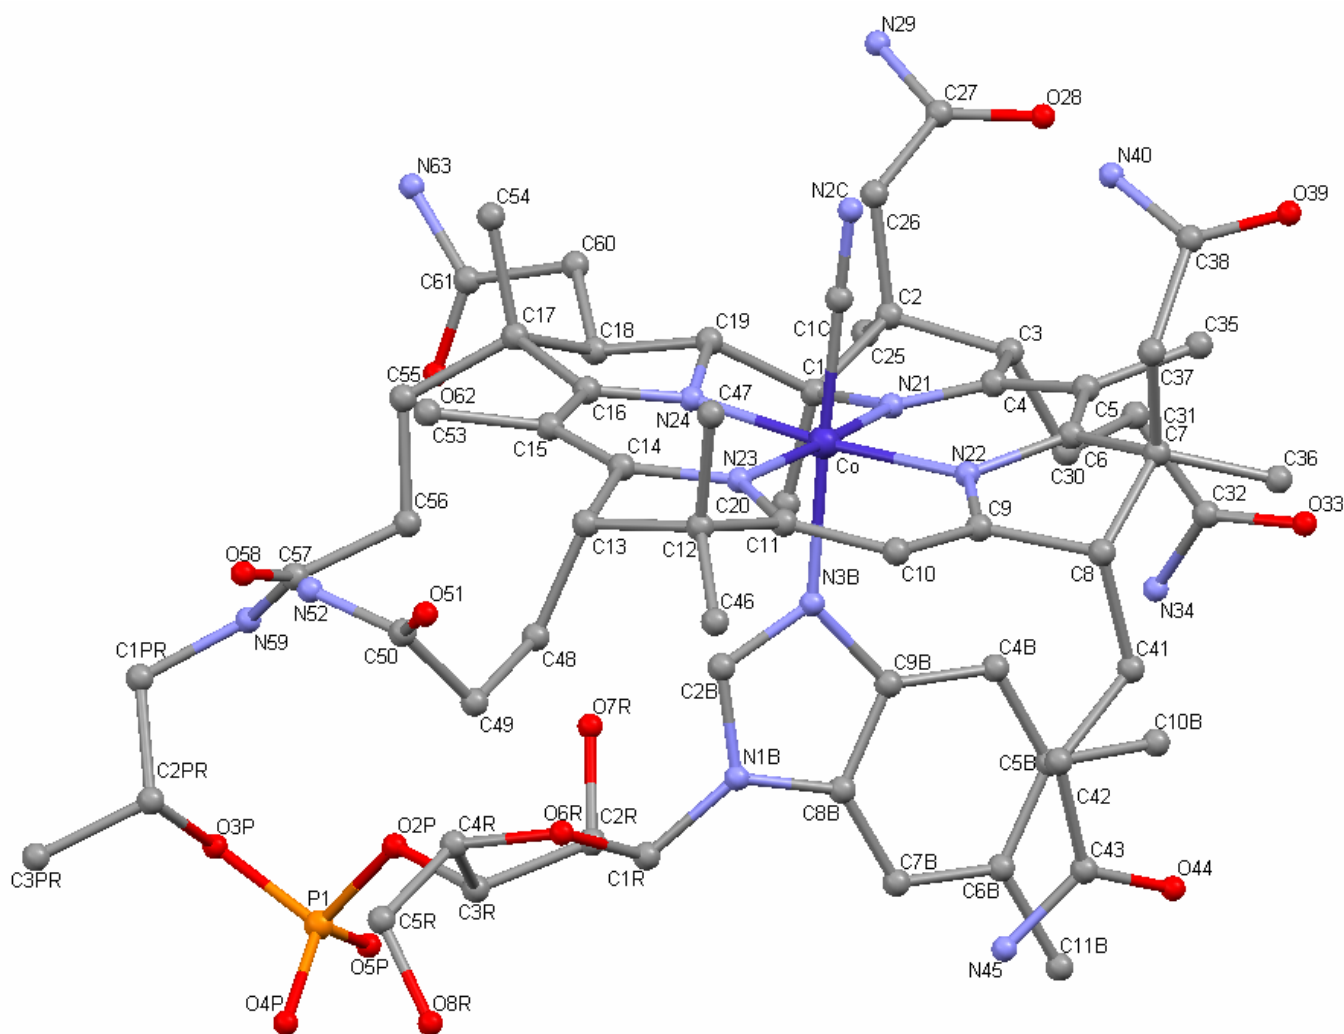

**Structure comparison** with the 1964 “wet B12” structure by C. Brink-Shoemaker *et al.*<sup>1</sup>

| Water site assignment | Ambient pressure | 1.0 GPa                                   |
|-----------------------|------------------|-------------------------------------------|
| Pocket region         | OW1-OW11 + OW13  | OW1-OW8 + OW10-OW11 + OW14-15 + OW22-OW23 |
| Channel region        | OW12             | OW9 + OW12-OW13 + OW16-OW21 + OW24        |

Note: between the pocket and channel regions there is a less well-defined interface region. For example, at 1.0 GPa, atoms OW22 and OW23 belong to this region.

Water O-atom site correspondence.

| Ambient pressure | Ambient pressure (1964 structure) | High pressure |
|------------------|-----------------------------------|---------------|
| 1                | <b>4</b>                          | 1             |
| 2                | <b>10</b>                         | 2             |
| 3                | <b>3</b>                          | 3             |
| 4                | <b>5</b>                          | 4             |
| 5                | <b>2</b>                          | 5             |
| 6                | <b>1</b>                          | 6             |
| 7                | <b>13</b>                         | 7             |
| 8                |                                   | -             |
| 9                | <b>12</b>                         | -             |
| 10               | 6b                                | 10            |
| 11               | 7a+7b                             | (12)          |
| 12               | 9a                                | 17            |
| 13               | 6c                                | 8             |

Note: In 1964, on the basis of experimental density measurements, the structure of wet B12 was assigned 22 water molecules per formula unit; using the diffraction data, 21-23 sites were then assigned, of which 8-9 (above in bold face) were assigned full and 28 half occupancy. Sites 1-5 (1964) are common to many B12 structures.

**Comment on displacement parameters and site occupancy:**

"Unusual high temperature factors are a sign for partially occupied solvent molecules. However, one should take into account that, due to their mobility, non-coordinating solvent molecules tend to show relatively large temperature factors. Therefore the ADPs should be significantly larger to justify a reduction of the occupation factors. A better criterion is the residual electron density map, which shows negative electron density at the nuclear positions if the occupancy is lower than one".

Extract from: <http://shelx.uni-ac.gwdg.de/~peterm/tutorial/do-type.htm>

<sup>1</sup> C. Brink-Shoemaker, D. W. J. Cruickshank, D. C. Hodgkin and M. J. Kamper, *Proc. R. Soc. London, Ser. A*, 1964, **278**, 1-26.

## PLATON<sup>2</sup> "SQUEEZE" and "CALC SOLV" calculations:

From the PLATON manual:

"The number of recovered electrons in the solvent area is strongly dependent on the quality of the low-angle reflections. Supply COMPLETE data sets!"

"As far as the refinement goes, the method tolerates in general the absence of a limited number of reflections."

If strong/low-angle reflections are missing, the squeeze procedure tends to underestimate the electron count. The electron count in from the squeeze calculation also strongly depends on the quality of the difference map.

### Ambient pressure calculation, PLATON(V-210110):

1) All O-water atoms deleted from the input file:

-----  
N: Number of moved primary input atoms: ..... 181  
W: Low density (check!) of ..... 0.996 gcm<sup>-3</sup>  
N: Total Potential Solvent Accessible Void Vol ..... 2978.6 Ang<sup>3</sup>  
N: Electron Count / Cell = 973 - To be included in D(calc), F000 & Mol.Wght.  
(convergence reached in 24 cycles)  
→ *ca.* 24 water molecules per B12 formula unit

2) All O-water atoms deleted from the input file, apart from the 5 fully occupied ones:

-----  
N: Number of moved primary input atoms: ..... 186  
N: Total Potential Solvent Accessible Void Vol ..... 2531.6 Ang<sup>3</sup>  
N: Electron Count / Cell = 856 - To be included in D(calc), F000 & Mol.Wght.  
Missing Reflections below sin(theta)/lambda=0.3 (*partially obscured by the beamstop*)  
→ *ca.* 21.5 + 5 = 26.5 water molecules per B12 formula unit

3) All O-water atoms kept in the input file:

-----  
N: Number of moved primary input atoms: ..... 194  
N: Total Potential Solvent Accessible Void Vol ..... 1678.3 Ang<sup>3</sup>  
N: Electron Count / Cell = 581 - To be included in D(calc), F000 & Mol.Wght.  
(convergence reached in 11 cycles)  
→ *ca.* 14.5 + 9 = 23.5 water molecules per B12 formula unit

### 1.0 GPa calculation, PLATON(V-210110):

1) All O-water atoms deleted from the input file:

-----  
N: Number of moved primary input atoms: ..... 181  
N: Total Potential Solvent Accessible Void Vol ..... 2149.9 Ang<sup>3</sup>  
N: Electron Count / Cell = 681 - To be included in D(calc), F000 & Mol.Wght.  
(convergence reached in 8 cycles)  
:: Number of Missing Low Order Reflections = 116  
→ *ca.* 17 water molecules per B12 formula unit

---

<sup>2</sup> P. v. d. Sluis and A. L. Spek, *Acta Crystallogr., Sect. A: Found. Crystallogr.*, 1990, **46**, 194-201. A. L. Spek, *J. Appl. Cryst.*, 2003, **36**, 7-13; A. L. Spek, *Acta Crystallogr., Sect. D: Biol. Crystallogr.*, 2009, **65**, 148-155.

2) All O-water atoms deleted from the input file apart from the ones with the 12 lowest  $U_{iso}$ :

-----  
N: Number of moved primary input atoms: ..... 193  
N: Total Potential Solvent Accessible Void Vol ..... 1038.3 Ang<sup>3</sup>  
N: Electron Count / Cell = 304 - To be included in D(calc), F000 & Mol.Wght.  
(convergence reached in 6 cycles)  
→ *ca.* 7.5 + 12 = 19.5 water molecules per B12 formula unit

---

The same calculations using a previous version of the PLATON executable give different results  
PLATON(V-180105)

Ambient pressure calculation, PLATON(V-180105):

1) All O-water atoms deleted from the input file:

-----  
N: Number of moved primary input atoms: ..... 181  
N: Total Potential Solvent Accessible Void Vol ..... 2978.6 Ang<sup>3</sup>  
N: Electron Count / Cell = 927 - To be included in D(calc), F000 & Mol.Wght.  
→ *ca.* 23 water molecules per B12 formula unit

2) All O-water atoms kept the input file:

-----  
N: Number of moved primary input atoms: ..... 194  
N: Total Potential Solvent Accessible Void Vol ..... 1678.3 Ang<sup>3</sup>  
N: Electron Count / Cell = 575 - To be included in D(calc), F000 & Mol.Wght.  
→ *ca.* 14.5 + 9 = 23.5 water molecules per B12 formula unit

---

1.0 GPa calculation, PLATON(V-180105):

1) All O-water atoms deleted from the input file:

-----  
N: Number of moved primary input atoms: ..... 181  
N: Total Potential Solvent Accessible Void Vol ..... 2149.9 Ang<sup>3</sup>  
N: Electron Count / Cell = 599 - To be included in D(calc), F000 & Mol.Wght.  
→ *ca.* 15 water molecules per B12 formula unit

2) All O-water atoms deleted from the input file apart from the ones with the 11 lowest  $U_{iso}$ :

-----  
N: Number of moved primary input atoms: ..... 192  
N: Total Potential Solvent Accessible Void Vol ..... 1176.7 Ang<sup>3</sup>  
N: Electron Count / Cell = 316 - To be included in D(calc), F000 & Mol.Wght.  
→ *ca.* 8 + 11 = 19 water molecules per B12 formula unit



## Electron density maps

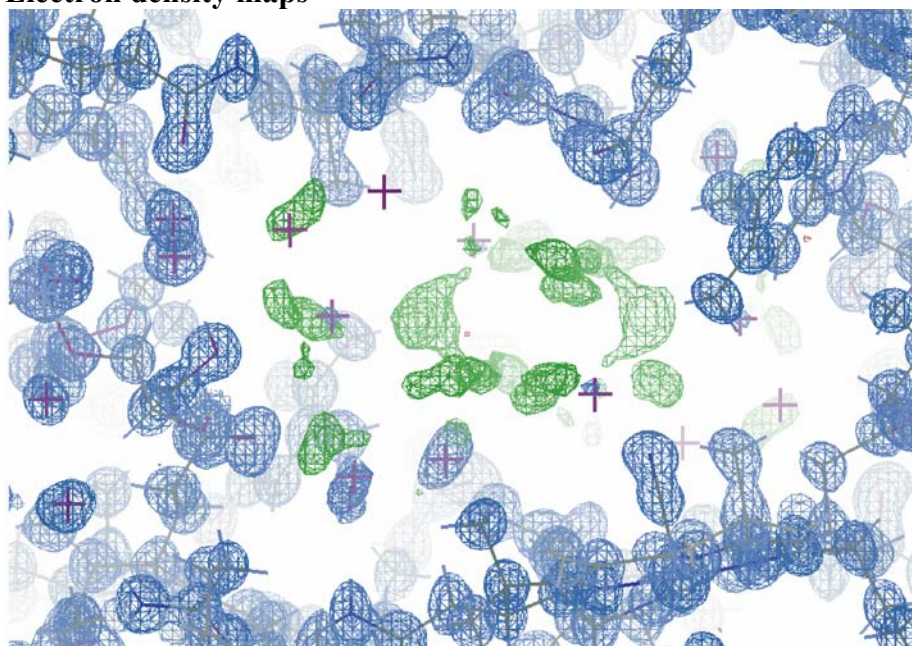

a

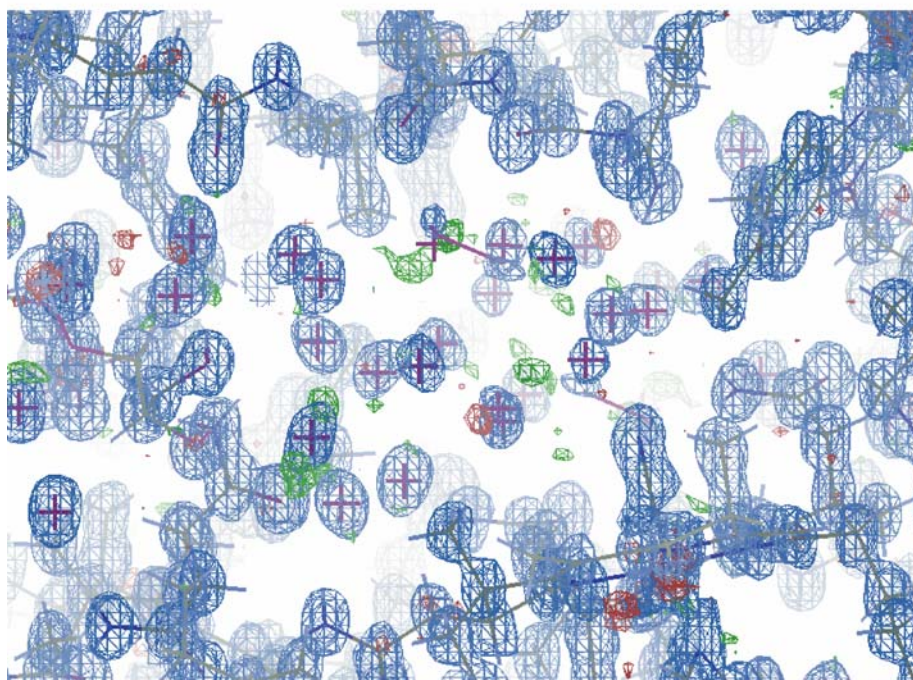

b

Electron density maps generated with COOT<sup>3</sup> for wet B12 at a) ambient pressure and b) at 1.0 GPa viewed along the solvent channel. 2Fo-Fc (also called sigma A) map in blue; Fo-Fc maps in red (-ve, indicating density is misplaced in the model) and green (+ve, indicating density is missing in the model). Contour levels: Fo-Fc maps at 3 $\sigma$  [a) 0.55 e<sup>-</sup>/Å<sup>3</sup>, b) 0.38 e<sup>-</sup>/Å<sup>3</sup>]; 2Fo-Fc maps at 1.5  $\sigma$  [a) 1.37 e<sup>-</sup>/Å<sup>3</sup>, b) 1.46 e<sup>-</sup>/Å<sup>3</sup>]. Note that at high pressure there is considerably less positive density in the channel.

<sup>3</sup> P. Emsley and K. Cowtan, *Acta Crystallogr., Sect. D: Biol. Crystallogr.*, 2004, **60**, 2126–2132.

## Side chains torsion angles

**Table 1** Selected torsion angles (°) of amide side chains a-g.

|                     |                  |                 |                  |
|---------------------|------------------|-----------------|------------------|
| <b>Side chain a</b> | C2-C26-C27-O28   | C2-C26-C27-N29  | C1-C2-C26-C27    |
| 0.1 MPa             | -52.1(10)        | 130.5(5)        | 175.9(3)         |
| 1.0 GPa             | -61.2(11)        | 116.6(9)        | -177.1(6)        |
| <b>Side chain b</b> | C30-C31-C32-O33  | C30-C31-C32-N34 | C3-C30-C31-C32   |
| 0.1 MPa             | -89.3(8)         | 93.4(6)         | 172.9(4)         |
| 1.0 GPa             | -94.8(9)         | 83.3(10)        | 166.3(7)         |
| <b>Side chain c</b> | C7-C37-C38-O39   | C7-C37-C38-N40  | C8-C7-C37-C38    |
| 0.1 MPa             | -82.5(7)         | 94.6(6)         | 67.2(4)          |
| 1.0 GPa             | -85.9(11)        | 92.2(9)         | -173.2(6)        |
| <b>Side chain d</b> | C41-C42-C43-O44  | C41-C42-C43-N45 | C8-C41-C42-C43   |
| 0.1 MPa             | 30.6(9)          | -156.0(6)       | -178.3(4)        |
| 1.0 GPa             | 21.1(12)         | -159.7(7)       | 175.5(6)         |
| <b>Side chain e</b> | C48-C49-C50-O51  | C48-C49-C50-N52 | C13-C48-C49-C50  |
| 0.1 MPa             | -114.0(7)        | 66.6(8)         | 45.5(7)          |
| 1.0 GPa             | -111.7(9)        | 69.0(11)        | 42.9(10)         |
| <b>Side chain f</b> | C455-C56-C57-O58 | C55-C56-C57-N59 | C56-C57-N59-C1PR |
| 0.1 MPa             | -59.3(5)         | 120.3(4)        | 177.1(3)         |
| 1.0 GPa             | -63.3(11)        | 112.0(10)       | 178.1(7)         |
| <b>Side chain g</b> | C18-C60-C61-O62  | C18-C60-C61-N63 | C17-C18-C60-C61  |
| 0.1 MPa             | -37.2(6)         | 143.8(4)        | -77.5(4)         |
| 1.0 GPa             | -43.3(12)        | 140.0(8)        | -69.8(11)        |

**H-bonding parameters****Table 2** H-bonding parameters (Å, °) for wet cyanocobalamin at conditions of ambient and high pressure, where cyanocobalamin is the H-bonding donor.

|              | D...A<br>D-H...A <sup>a</sup> | 0.1 MPa                       | 0.98 GPa                |
|--------------|-------------------------------|-------------------------------|-------------------------|
| Ribose       | O7R-H7R..OW1                  | 2.779(5)<br>172               | 2.691(8)<br>171         |
|              | O8R-H8R..OW4                  | 3.332(13) <sup>b</sup><br>176 | 2.903(13)<br>153        |
| Side chain a | N29-H29A...O44                | 3.075(8)<br>172               | 2.937(9)<br>161         |
|              | N29-H29B...OW7                | 3.095(17)<br>145              | 3.168(10)<br>145        |
| Side chain b | N34-H34A...OW2                | 3.142(9)<br>143               | 2.972(17) [14]a<br>149  |
| Side chain c | N40-H40A...O5P                | 2.985(6)<br>167               | -                       |
|              | N40-H40A...OW                 | -                             | 3.164(17) [10]a<br>150  |
|              | N40-H40A...OW                 | -                             | 3.15(3) [22]a,b<br>126  |
|              | N40-H40B...OW4                | 2.890(8)<br>142               | -                       |
| Side chain d | N40-H40B...N2C<br>(intra)     | -                             | 3.152(11)<br>164        |
|              | N45-H45A OW                   | -                             | 2.957(15) [9]a,b<br>177 |
|              | N45-H45B...OW6                | 3.005(19)<br>170              | 3.148(11)<br>168        |
| Side chain e | N52-H52A...O28                | 2.886(8)<br>145               | 2.900(9)<br>139         |
|              | N52-H52B...OW5                | 2.986(10)<br>161              | 2.887(13)<br>160        |
| Side chain f | N59-H59...OW2                 | 2.922(6)<br>162               | 2.981(13)<br>164        |
| Side chain g | N63-H63A...O51                | 2.960(6)<br>159               | 2.973(9)<br>168         |
|              | N63-H63B...OW8c               | 2.975(17)<br>161              | -                       |
|              | N63-H63B...O33                | -                             | 2.892(12)<br>155        |

**cont.**



**Table 2 (cont.)** H-bonding parameters (Å, °) for wet cyanocobalamin at conditions of ambient and high pressure, where cyanocobalamin is the H-bonding donor.

|                                  | D...A<br>D-H...A <sup>a</sup> | 0.1 MPa                        | 1.0 GPa                       |
|----------------------------------|-------------------------------|--------------------------------|-------------------------------|
| C-H...A H-<br>bonds <sup>d</sup> | C1R-H1R...O39                 | -                              | 3.203(12)<br>132              |
|                                  | C1R-H1R...OW10                | <i>3.465(18)</i><br><i>168</i> | -                             |
|                                  | C3-H3...O28<br>(intra)        | 2.962(9)<br>135                | 3.023(10)<br>133              |
|                                  | C3R-H3R...O4P<br>(intra)      | -                              | 2.949(10)<br>104              |
|                                  | C3PR-H3PR...O39               | <i>3.357(7)</i><br><i>139</i>  | -                             |
|                                  | C8-H8...O39<br>(intra)        | 3.094(6)<br>133                | -                             |
|                                  | C10-H10...O58                 | -                              | <i>3.434(9)</i><br><i>156</i> |
|                                  | C18-H18...O62<br>(intra)      | 2.917(5)<br>101                | -                             |
|                                  | C20-H20C...N3B<br>(intra)     | 3.200(4)<br>137                | 3.174(8)<br>137               |

<sup>a</sup> Water O-atoms (OW) numbering scheme in this column given according to OW sites found in the ambient-pressure structure. Where no correspondence between atomic sites is observed at high-pressure, the high-pressure site number is given in square brackets in the last column. <sup>b</sup> Values in italics indicate long contacts. <sup>c</sup> Site disordered over two positions. <sup>d</sup> Further C-H(methyl)...O H-bonds are observed in the high-pressure structures. All standard uncertainties calculated with PLATON.<sup>2</sup>

**Table 3** H-bonding distances (Å) for wet cyanocobalamin at conditions of ambient and high pressure, where cyanocobalamin is the H-bonding acceptor.

|              | A...D <sup>a</sup>     | 0.1 MPa                               | 1.0 GPa                                                    |
|--------------|------------------------|---------------------------------------|------------------------------------------------------------|
| Side chain a | O28...N52 <sup>R</sup> | 2.886(8)                              | 2.897(9)                                                   |
|              | O28...OW               | -                                     | 3.189(15) [19] <sup>a</sup>                                |
|              | O28...OW               | -                                     | 2.99(3) [22] <sup>a,b</sup><br>2.74(2) [23] <sup>a,b</sup> |
| Side chain b | O33...OW8 <sup>b</sup> | 2.574(15)<br>2.81(2) [9] <sup>b</sup> | 2.905(7) [3] <sup>a</sup>                                  |
|              | O33...OW               | -                                     | 2.893(11) [9] <sup>a</sup>                                 |
|              | O33...N63 <sup>R</sup> | -                                     | 2.886(12)                                                  |
|              | O39...OW3              | 2.634(8)                              | 3.090(10) [4] <sup>a</sup>                                 |

**cont.**

**Table 3 (cont.)** H-bonding distances (Å) for wet cyanocobalamin at conditions of ambient and high pressure, where cyanocobalamin is the H-bonding acceptor.

|              | A...D <sup>a</sup>     | 0.1 MPa  | 1.0 GPa                     |
|--------------|------------------------|----------|-----------------------------|
| Side chain c | O39...OW               |          | 2.931(10) [8] <sup>a</sup>  |
| Side chain d | O44...N29 <sup>R</sup> | 3.075(8) | 2.938(9)                    |
|              | O44...OW               | -        | 2.689(15) [19] <sup>a</sup> |
| Side chain e | O51...N63 <sup>R</sup> | 2.960(6) | 2.974(9)                    |
|              | O51...OW11             | 2.45(3)  | 2.69(4) [21] <sup>a</sup>   |
|              |                        | -        | 3.08(3) [23] <sup>a,b</sup> |
| Side chain f | O58...OW5              | 2.759(8) | 2.733(8)                    |
|              | O62...OW2              | 2.943(9) | 2.753(17) [15] <sup>a</sup> |
| Side chain g | O62...OW4              | 2.772(8) | 2.788(12)                   |
| Phosphate    | O4P...OW1              | 2.712(6) | 2.774(8)                    |
|              | O4P...OW4              | 2.740(8) | 2.682(10)                   |
|              | O5P...OW3              | 2.676(8) | 2.674(8)                    |
|              | O5P...N34 <sup>R</sup> | 2.984(8) | 3.016(12)                   |
|              | O5P...N40 <sup>R</sup> | 2.985(6) | -                           |
| Ribose       | O8R...OW               | -        | 3.124(12) [2] <sup>a</sup>  |
|              | O8R...OW               |          | 2.832(13) [11] <sup>a</sup> |
| Cyanide      | N2C...OW12             | 3.10(2)  | 3.063(16) [9] <sup>a</sup>  |
|              | N2C...OW               | -        | 3.150(15) [16] <sup>a</sup> |
|              | N2C...OW               | -        | 3.065(19) [17] <sup>a</sup> |
|              | N2C...N40 <sup>R</sup> | -        | 3.160(11)                   |

<sup>a</sup> Water O-atoms (OW) numbering scheme in this column given according to OW sites found in the ambient-pressure structure. Where no correspondence between atomic sites is observed at high-pressure, the high-pressure site number is given in square brackets in the last column. <sup>b</sup> Site disordered over two positions. <sup>R</sup> Contact also present in Table 2. All standard uncertainties calculated with PLATON.<sup>2</sup>

**Table 4a** H-bonding distances (Å) for wet cyanocobalamin at conditions of ambient pressure: OW...OW and OW...Y contacts as calculated by PLATON.<sup>2</sup> Only unique contacts have been considered for creating Fig. 7 in the manuscript.

| -----          |            |            |           | -----          |            |            |         |
|----------------|------------|------------|-----------|----------------|------------|------------|---------|
| At(I)[1555.03] | At(J)      | [ ARU(J) ] | D(I-J)    | At(I)[1555.03] | At(J)      | [ ARU(J) ] | D(I-J)  |
| OW1            | .... OW2   | [ ]        | 2.790(10) | *OW10          | .... *OW13 | [ ]        | 2.66(3) |
| OW1            | .... O7R   | [ ]        | 2.779(5)  |                |            |            |         |
| OW1            | .... OW3   | [ 3566 ]   | 2.779(9)  | *OW11          | .... O51   | [ ]        | 2.45(3) |
| OW1            | .... O4P   | [ 3566 ]   | 2.712(6)  | *OW11          | .... *OW13 | [ 2475 ]   | 2.96(3) |
|                |            |            |           |                |            |            |         |
| OW2            | .... OW1   | [ ]        | 2.790(10) | *OW12          | .... N2C   | [ ]        | 3.10(2) |
| OW2            | .... O62   | [ ]        | 2.943(9)  |                |            |            |         |
| OW2            | .... N59   | [ ]        | 2.922(6)  | *OW13          | .... *OW10 | [ ]        | 2.66(3) |
| OW2            | .... N34   | [ 3466 ]   | 3.142(9)  | *OW13          | .... *OW11 | [ 2475 ]   | 2.96(3) |
|                |            |            |           |                |            |            |         |
| OW3            | .... OW5   | [ ]        | 2.884(11) |                |            |            |         |
| OW3            | .... OW1   | [ 3466 ]   | 2.779(9)  |                |            |            |         |
| OW3            | .... O5P   | [ 3466 ]   | 2.676(8)  |                |            |            |         |
| OW3            | .... O39   | [ 4545 ]   | 2.634(8)  |                |            |            |         |
|                |            |            |           |                |            |            |         |
| OW4            | .... N40   | [ ]        | 2.890(8)  |                |            |            |         |
| OW4            | .... O4P   | [ 2574 ]   | 2.740(8)  |                |            |            |         |
| OW4            | .... *OW13 | [ 2574 ]   | 2.78(2)   |                |            |            |         |
| OW4            | .... O62   | [ 4655 ]   | 2.772(8)  |                |            |            |         |
|                |            |            |           |                |            |            |         |
| OW5            | .... OW3   | [ ]        | 2.884(11) |                |            |            |         |
| OW5            | .... O58   | [ ]        | 2.759(8)  |                |            |            |         |
| OW5            | .... N52   | [ ]        | 2.986(10) |                |            |            |         |
|                |            |            |           |                |            |            |         |
| *OW6           | .... N45   | [ ]        | 3.005(19) |                |            |            |         |
|                |            |            |           |                |            |            |         |
| *OW7           | .... *OW8  | [ ]        | 2.78(2)   |                |            |            |         |
| *OW7           | .... *OW9  | [ ]        | 2.56(3)   |                |            |            |         |
| *OW7           | .... N29   | [ ]        | 3.095(17) |                |            |            |         |
|                |            |            |           |                |            |            |         |
| *OW8           | .... *OW7  | [ ]        | 2.78(2)   |                |            |            |         |
| *OW8           | .... N63   | [ ]        | 2.975(17) |                |            |            |         |
| *OW8           | .... O33   | [ 4645 ]   | 2.574(15) |                |            |            |         |
|                |            |            |           |                |            |            |         |
| *OW9           | .... *OW7  | [ ]        | 2.56(3)   |                |            |            |         |
| *OW9           | .... N63   | [ ]        | 2.78(2)   |                |            |            |         |
| *OW9           | .... O33   | [ 4645 ]   | 2.81(2)   |                |            |            |         |

  

| Asymmetric Residue Unit (= ARU) Code List |                    |
|-------------------------------------------|--------------------|
| ARU-CODE                                  | Symmetry-Code      |
| -----                                     |                    |
| -----                                     |                    |
| [ 2575 ]                                  | = 1/2-x,2-y,1/2+z  |
| [ 2475 ]                                  | = -1/2-x,2-y,1/2+z |
| [ 3466 ]                                  | = -1/2+x,3/2-y,1-z |
| [ 3566 ]                                  | = 1/2+x,3/2-y,1-z  |
| [ 1655 ]                                  | = 1+x,y,z          |
| [ 4655 ]                                  | = 1-x,1/2+y,1/2-z  |
| [ 4555 ]                                  | = -x,1/2+y,1/2-z   |
| [ 4545 ]                                  | = -x,-1/2+y,1/2-z  |
| [ 4645 ]                                  | = 1-x,-1/2+y,1/2-z |
| [ 2574 ]                                  | = 1/2-x,2-y,-1/2+z |
| [ 1455 ]                                  | = -1+x,y,z         |
| [ 1655 ]                                  | = 1+x,y,z          |

**Table 4b** H-bonding distances (Å) for wet cyanocobalamin at conditions at 1.0 GPa: OW...OW and OW...Y contacts as calculated by PLATON.<sup>2</sup> Only unique contacts have been considered for creating Fig. 7 in the manuscript.

| -----          |            |            |           | -----          |            |            |           |
|----------------|------------|------------|-----------|----------------|------------|------------|-----------|
| At(I)[1555.03] | At(J)      | [ ARU(J) ] | D(I-J)    | At(I)[1555.03] | At(J)      | [ ARU(J) ] | D(I-J)    |
| OW1            | .... OW2   | [ ]        | 2.685(11) | OW9            | .... OW19  | [ ]        | 3.027(17) |
| OW1            | .... O7R   | [ ]        | 2.691(8)  | OW9            | .... *OW24 | [ ]        | 2.75(2)   |
| OW1            | .... OW3   | [ 2575 ]   | 2.944(10) | OW9            | .... N45   | [ ]        | 2.957(15) |
| OW1            | .... O4P   | [ 3566 ]   | 2.776(8)  | OW9            | .... N2C   | [ 2575 ]   | 3.058(16) |
|                |            |            |           | OW9            | .... OW13  | [ 4555 ]   | 2.876(19) |
| OW2            | .... OW1   | [ ]        | 2.685(11) | OW10           | .... N40   | [ ]        | 3.164(17) |
| OW2            | .... OW15  | [ ]        | 2.856(16) | OW10           | .... OW6   | [ 2574 ]   | 2.98(2)   |
| OW2            | .... N59   | [ ]        | 2.981(13) | OW10           | .... OW8   | [ 2574 ]   | 2.810(18) |
| OW2            | .... O8R   | [ 3566 ]   | 3.124(12) | OW10           | .... OW20  | [ 4645 ]   | 2.76(2)   |
| OW3            | .... OW1   | [ 2574 ]   | 2.944(10) |                |            |            |           |
| OW3            | .... O5P   | [ 2574 ]   | 2.673(8)  | OW11           | .... OW6   | [ ]        | 3.041(14) |
| OW3            | .... OW5   | [ 4555 ]   | 2.804(11) | OW11           | .... O8R   | [ ]        | 2.831(13) |
| OW4            | .... O4P   | [ ]        | 2.681(10) | OW11           | .... O33   | [ 1455 ]   | 2.890(12) |
| OW4            | .... OW8   | [ ]        | 2.960(12) | OW11           | .... OW12  | [ 4555 ]   | 2.88(2)   |
| OW4            | .... O8R   | [ ]        | 2.903(13) |                |            |            |           |
| OW4            | .... O39   | [ 2575 ]   | 3.091(10) |                |            |            |           |
| OW4            | .... O62   | [ 3466 ]   | 2.787(12) |                |            |            |           |
| OW5            | .... O58   | [ ]        | 2.735(8)  |                |            |            |           |
| OW5            | .... N52   | [ ]        | 2.888(13) |                |            |            |           |
| OW5            | .... OW3   | [ 4545 ]   | 2.804(11) |                |            |            |           |
| OW6            | .... OW11  | [ ]        | 3.041(14) |                |            |            |           |
| OW6            | .... N1B   | [ ]        | 3.220(11) |                |            |            |           |
| OW6            | .... N45   | [ ]        | 3.148(11) |                |            |            |           |
| OW6            | .... OW10  | [ 2575 ]   | 2.98(2)   |                |            |            |           |
| OW7            | .... OW16  | [ ]        | 2.721(16) |                |            |            |           |
| OW7            | .... N29   | [ ]        | 3.168(10) |                |            |            |           |
| OW7            | .... O33   | [ 4645 ]   | 2.908(10) |                |            |            |           |
| OW8            | .... OW4   | [ ]        | 2.960(12) |                |            |            |           |
| OW8            | .... *OW22 | [ ]        | 2.94(3)   |                |            |            |           |
| OW8            | .... *OW23 | [ ]        | 2.67(2)   |                |            |            |           |
| OW8            | .... OW10  | [ 2575 ]   | 2.810(18) |                |            |            |           |
| OW8            | .... O39   | [ 2575 ]   | 2.930(10) |                |            |            |           |
| OW8            | .... OW15  | [ 3466 ]   | 2.680(15) |                |            |            |           |

  

| Asymmetric Residue Unit (= ARU) Code List |                     |
|-------------------------------------------|---------------------|
| ARU-CODE                                  | Symmetry-Code       |
| -----                                     |                     |
| -----                                     |                     |
| -----                                     |                     |
| [ 3466 ]                                  | = -1/2+x,3/2-y,1-z  |
| [ 2575 ]                                  | = 1/2-x,2-y,1/2+z   |
| [ 1655 ]                                  | = 1+x,y,z           |
| [ 2574 ]                                  | = 1/2-x,2-y,-1/2+z  |
| [ 4645 ]                                  | = 1-x,-1/2+y,1/2-z  |
| [ 4655 ]                                  | = 1-x,1/2+y,1/2-z   |
| [ 2574 ]                                  | = 1/2-x,2-y,-1/2+z  |
| [ 4555 ]                                  | = -x,1/2+y,1/2-z    |
| [ 1455 ]                                  | = -1+x,y,z          |
| [ 2474 ]                                  | = -1/2-x,2-y,-1/2+z |
| [ 4545 ]                                  | = -x,-1/2+y,1/2-z   |
| [ 3566 ]                                  | = 1/2+x,3/2-y,1-z   |
| [ 3476 ]                                  | = -1/2+x,5/2-y,1-z  |
| [ 3565 ]                                  | = 1/2+x,3/2-y,-z    |
| [ 3576 ]                                  | = 1/2+x,5/2-y,1-z   |
| [ 3465 ]                                  | = -1/2+x,3/2-y,-z   |

cont.

**Table 4b (cont.)**

| -----          |       |                |           | -----                                     |                     |               |         |
|----------------|-------|----------------|-----------|-------------------------------------------|---------------------|---------------|---------|
| At(I)[1555.03] | At(J) | [ ARU(J) ]     | D(I-J)    | At(I)[1555.03]                            | At(J)               | [ ARU(J) ]    | D(I-J)  |
| OW12           | ....  | OW16 [ ]       | 2.87(2)   | *OW21                                     | ....                | OW13 [ ]      | 2.45(3) |
| OW12           | ....  | *OW21 [ 3565 ] | 2.88(4)   | *OW21                                     | ....                | O51 [ ]       | 2.70(4) |
| OW12           | ....  | OW11 [ 4545 ]  | 2.879(19) | *OW21                                     | ....                | OW12 [ 3465 ] | 2.88(4) |
| OW13           | ....  | *OW21 [ ]      | 2.45(3)   | *OW21                                     | ....                | OW15 [ 4555 ] | 3.06(3) |
| OW13           | ....  | OW18 [ 2574 ]  | 2.82(2)   | *OW21                                     | ....                | OW19 [ 4545 ] | 2.96(3) |
| OW13           | ....  | OW20 [ 2574 ]  | 2.848(19) | *OW21                                     | ....                | OW23* [ ]     | 2.63(4) |
| OW13           | ....  | OW9 [ 4545 ]   | 2.876(19) | *OW22                                     | ....                | OW8 [ ]       | 2.94(3) |
| OW14           | ....  | OW18 [ ]       | 2.902(18) | *OW22                                     | ....                | O28 [ 2575 ]  | 2.99(4) |
| OW14           | ....  | N34 [ ]        | 2.972(17) | *OW22                                     | ....                | N40 [ 2575 ]  | 3.15(3) |
| OW14           | ....  | OW15 [ 3566 ]  | 2.862(19) | *OW23                                     | ....                | OW8 [ ]       | 2.67(2) |
| OW15           | ....  | OW2 [ ]        | 2.856(16) | *OW23                                     | ....                | O28 [ 2575 ]  | 2.74(2) |
| OW15           | ....  | O62 [ ]        | 2.751(17) | *OW23                                     | ....                | O51 [ 2475 ]  | 3.08(3) |
| OW15           | ....  | OW8 [ 3566 ]   | 2.680(15) | *OW23                                     | ....                | OW19 [ 3476 ] | 3.14(3) |
| OW15           | ....  | OW14 [ 3466 ]  | 2.862(19) | *OW23                                     | ....                | OW24* [ ]     | 2.76(3) |
| OW15           | ....  | *OW21 [ 4545 ] | 3.06(3)   | *OW24                                     | ....                | OW9 [ ]       | 2.75(2) |
| OW16           | ....  | OW7 [ ]        | 2.721(16) | *OW24                                     | ....                | OW16 [ 2575 ] | 3.07(2) |
| OW16           | ....  | OW12 [ ]       | 2.87(2)   | *OW24                                     | ....                | OW23* [ ]     | 2.76(3) |
| OW16           | ....  | N2C [ ]        | 3.150(15) | Asymmetric Residue Unit (= ARU) Code List |                     |               |         |
| OW16           | ....  | *OW24 [ 2574 ] | 3.07(2)   | ARU-CODE                                  | Symmetry-Code       | -----         |         |
| OW16           | ....  | OW18 [ 4645 ]  | 3.12(2)   | -----                                     | -----               | -----         |         |
| OW17           | ....  | OW18 [ ]       | 2.92(2)   | [ 3466 ]                                  | = -1/2+x,3/2-y,1-z  |               |         |
| OW17           | ....  | OW19 [ ]       | 2.60(2)   | [ 2575 ]                                  | = 1/2-x,2-y,1/2+z   |               |         |
| OW17           | ....  | OW20 [ ]       | 2.62(2)   | [ 1655 ]                                  | = 1+x,y,z           |               |         |
| OW17           | ....  | N2C [ 2575 ]   | 3.065(19) | [ 2574 ]                                  | = 1/2-x,2-y,-1/2+z  |               |         |
| OW18           | ....  | OW14 [ ]       | 2.902(18) | [ 4645 ]                                  | = 1-x,-1/2+y,1/2-z  |               |         |
| OW18           | ....  | OW17 [ ]       | 2.92(2)   | [ 4655 ]                                  | = 1-x,1/2+y,1/2-z   |               |         |
| OW18           | ....  | OW13 [ 2575 ]  | 2.82(2)   | [ 2574 ]                                  | = 1/2-x,2-y,-1/2+z  |               |         |
| OW18           | ....  | OW16 [ 4655 ]  | 3.12(2)   | [ 4555 ]                                  | = -x,1/2+y,1/2-z    |               |         |
| OW19           | ....  | OW9 [ ]        | 3.027(17) | [ 1455 ]                                  | = -1+x,y,z          |               |         |
| OW19           | ....  | OW17 [ ]       | 2.60(2)   | [ 2474 ]                                  | = -1/2-x,2-y,-1/2+z |               |         |
| OW19           | ....  | O44 [ ]        | 2.690(15) | [ 4545 ]                                  | = -x,-1/2+y,1/2-z   |               |         |
| OW19           | ....  | *OW23 [ 3576 ] | 3.14(3)   | [ 3566 ]                                  | = 1/2+x,3/2-y,1-z   |               |         |
| OW19           | ....  | *OW21 [ 4555 ] | 2.96(3)   | [ 3476 ]                                  | = -1/2+x,5/2-y,1-z  |               |         |
| OW19           | ....  | O28 [ 4655 ]   | 3.189(15) | [ 3565 ]                                  | = 1/2+x,3/2-y,-z    |               |         |
| OW20           | ....  | OW17 [ ]       | 2.62(2)   | [ 3576 ]                                  | = 1/2+x,5/2-y,1-z   |               |         |
| OW20           | ....  | OW13 [ 2575 ]  | 2.848(19) | [ 3465 ]                                  | = -1/2+x,3/2-y,-z   |               |         |
| OW20           | ....  | OW10 [ 4655 ]  | 2.76(2)   |                                           |                     |               |         |
